# Supplementary material
Source: PubMed Central journal article supplement (PMC6125212)
Supplement: NIHMS1500500-supplement-1.pdf [file NIHMS1500500-supplement-1.pdf]

## Supplemental Data

### Supplemental Figure 1

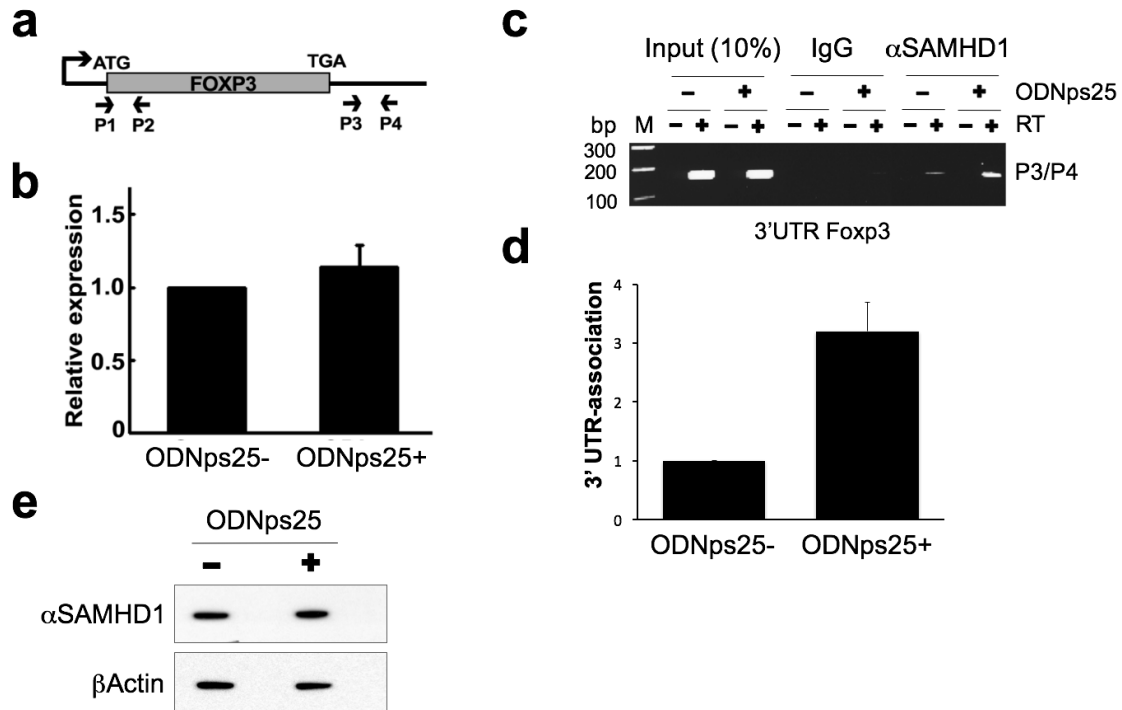

**Supplemental Figure 1.** (A) Locations of primer sets (P1/P2 and P3/P4) for RIP-qPCR within *Foxp3* transcript. Sequences of primer sets were informed in Methods. (B) Expression of total *Foxp3* mRNA in ODNps25-treated or control Tregs. polyclonal Tregs expanded *in vitro* were cultured with rIL-2 (200 IU/ml) in the presence or absence of ODNps25 (2 μM) for 36 hrs. P1 and P2 in (A) were used for the primer set of qRT-PCR. Data was normalized with external HPRT control. (C) RIP-qPCR for the detection of interaction between SAMHD1 and 3'UTR of *Foxp3* in the presence or absence of ODNps25. RIP analysis was performed from the whole extract of Tregs in (B), followed by qPCR with P3 and P4 primers specific to 3'UTR of *Foxp3*. (D) Relative quantification of RIP-qPCR results, was measured by SYBR green-qPCR. (E) Protein quantification of SAMHD1 in ODNps25-treated or control Tregs. Total proteins (5 μg/lane) were extracted from control or ODNps25-treated Tregs at post 36 hr-incubation.
